# Supplementary material for: Barriers to and Enablers of Childhood Immunization Uptake in First Nations Communities in Canada: A Rapid Review of the Literature
Source: Research Square preprint supplement (doi:10.21203/rs.3.rs-7097815/v1), 2025-09-08
Supplement: Supplementary file 1 [file 300de35ac7226a2ecc0b6988.docx]

**Literature Search terms Used**

The following terms were used:

Children 0–2 years of Age: ‘children’, ‘child’, ‘toddler’, ‘pediatric’, ‘paediatric’, ‘baby’, ‘newborn’, ‘neonates’, ‘infant’, ‘minors’, ‘childhood’.

Immunization: ‘vaccine’, ‘vaccination’, ‘immunization’, ‘immunisation’, ‘vaccine administration’, ‘protective shot’, ‘preventive injection’, ‘inoculation’.

Barrier: ‘barrier’, ‘hesitant’, ‘refuse’, ‘refusal’, ‘delay’, ‘denial’, ‘denied’, ‘concern’, ‘reason’, ‘non-acceptance’, ‘incomplete’, ‘obstacle’, ‘constraint’, ‘reluctance’.

Enabler: ‘Acceptance’, ‘facilitators’, ‘readiness’, ‘uptake’.

First Nations: ‘Indigenous Peoples’, ‘Aboriginal Peoples’, ‘First Peoples’, ‘Native Nations’, ‘Indigenous Communities’, ‘First Nations Communities’, ‘Tribal Nations of Original Peoples’, ‘Aboriginal Nations’.

Canada: ‘Canada’, ‘Canadian’, ‘Alberta’, ‘British Columbia’, ‘Manitoba’, ‘New Brunswick’, ‘Newfoundland and Labrador’, ‘Nova Scotia’, ‘Ontario’, ‘Prince Edward Island’, ‘Quebec’, ‘Saskatchewan’, ‘Northwest Territories’, ‘Nunavut’, ‘Yukon’.
